# Supplementary material for: Direct synthesis of dicarbollides
Source: Royal Society of Chemistry journal article supplement (doi:10.1039/c8nj00819a), 2018-01-01
Supplement: c8nj00819a1.pdf [file c8nj00819a1.pdf]

## SUPPLEMENTARY INFORMATION

### Direct Synthesis of Dicarbollides

Oleg L. Tok,<sup>a</sup> Josef Holub,<sup>a</sup> Aleš Růžička,<sup>b</sup> Zdeňka Růžičková<sup>b</sup> and Bohumil Štíbr<sup>a\*</sup>

<sup>a</sup>Institute of Inorganic Chemistry, Academy of Sciences of the Czech Republic, Husinec-Řež 1001, Czech Republic

<sup>b</sup>Department of General and Inorganic Chemistry, Faculty of Chemical Technology, University of Pardubice, Studentská 573, 532 10 Pardubice, Czech Republic

Submitted to New Journal of Chemistry

**Table S1.** Assignments in the <sup>11</sup>B NMR spectra of the isolated dicarbollide anions (Et<sub>3</sub>NH<sup>+</sup> salts in CD<sub>3</sub>CN).

| compound              | B(9,11)                           | B(5,6)                           | B(3)           | B(2,4)                           | B(10)              | B(1)           |
|-----------------------|-----------------------------------|----------------------------------|----------------|----------------------------------|--------------------|----------------|
| <b>2a<sup>-</sup></b> | -12.1/136/1.85                    | -18.0/124/1.13                   | -18.7/142/1.67 | -23.3/147/1.13                   | -34.4/132/32/0.02  | -39.0/140/0.44 |
| <b>2b<sup>-</sup></b> | -9.4/131/1.80                     | -18.6/142/1.25                   | -9.8/170/ 1.44 | -18.6/142/1.01                   | -35.1/141/53/-0.14 | -37.1/146/0.35 |
| <b>2c<sup>-</sup></b> | -9.0/147/ 2.00<br>-10.6/140/2.06  | -17.0/146/1.24<br>-18.2/150/1.19 | -13.9/171/1.76 | -19.9/150/1.71<br>-22.8/153/1.22 | -33.0/128/25/0.15  | -36.1/134/0.62 |
| <b>2d<sup>-</sup></b> | -8.8/136/ 2.01<br>-11.4/137/2.01  | -16.4/137/1.41<br>-18.4/132/1.41 | -13.9/159/2.23 | -20.4/143/1.53<br>-22.4/140/1.53 | -33.2/129/52/0.43  | -36.8/140/0.84 |
| <b>2e<sup>-</sup></b> | -10.1/135/ 1.94<br>-11.1/135/1.87 | -13.7/134/1.36<br>-18.7/138/1.06 | -17.5/156/1.63 | -20.1/148/1.20<br>22.7/148/1.09  | -33.5/126/43/0.48  | -37.5/137/0.00 |

Ordered as  $\delta(^{11}\text{B})/J_{\text{BH}}/\delta(^1\text{H})_{\text{BH}}$ , assigned by [<sup>11</sup>B-<sup>1</sup>B]-COSY and [<sup>11</sup>B-<sup>1</sup>H]-correlation spectroscopy.

### EXAMPLES OF NMR MEASUREMENTS

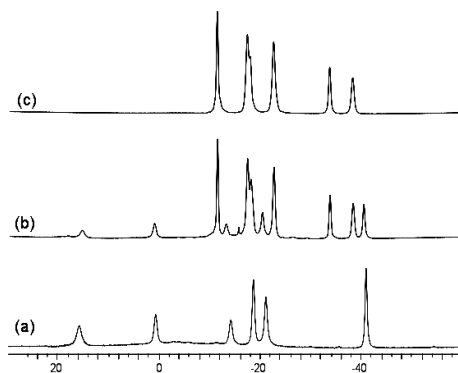

**Fig. S1.** <sup>11</sup>B{<sup>1</sup>H} NMR spectra (128.3 MHz) of (a) 4-Et<sub>3</sub>N-*arachno*-B<sub>9</sub>H<sub>13</sub> (**1**) in CD<sub>3</sub>CN, (c) 7,8-*nido*-C<sub>2</sub>B<sub>9</sub>H<sub>12</sub><sup>-</sup> NHEt<sub>3</sub><sup>+</sup> (**2a**) (in CD<sub>3</sub>CN), synthesized by Hawthorne's method and (b) reaction mixture, obtained after heating of **1** with an excess of C<sub>2</sub>H<sub>2</sub> in toluene (125°C, 4 h) and containing starting **1** and product **2a** in ca. 1:3 ratio.

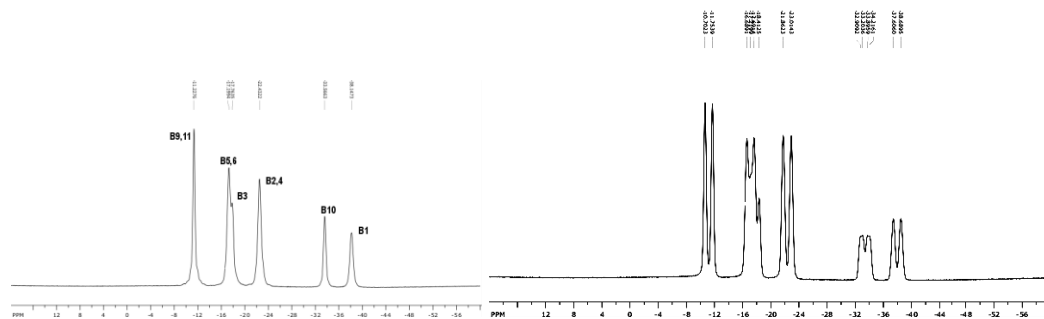

**Fig. S2.**  $^{11}\text{B}\{^1\text{H}\}$  and  $^{11}\text{B}$  NMR spectra of *nido*-7,8- $\text{C}_2\text{B}_9\text{H}_{12}^- \text{NHEt}_3^+$  (**2a**) (128.3 MHz,  $\text{CD}_3\text{CN}$ ).

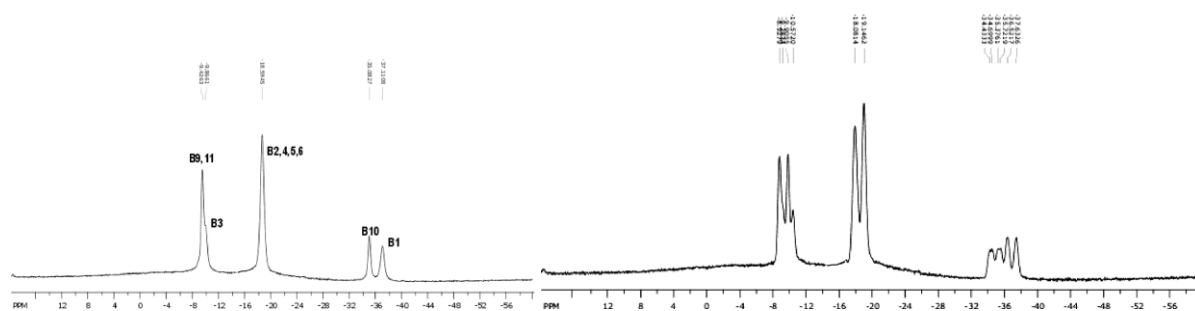

**Fig. S3.**  $^{11}\text{B}\{^1\text{H}\}$  and  $^{11}\text{B}$  NMR spectra of 7,8- $\text{Me}_2$ -*nido*-7,8- $\text{C}_2\text{B}_9\text{H}_{10}^- \text{NHEt}_3^+$  (**2b**) (128.3 MHz,  $\text{CD}_3\text{CN}$ ).

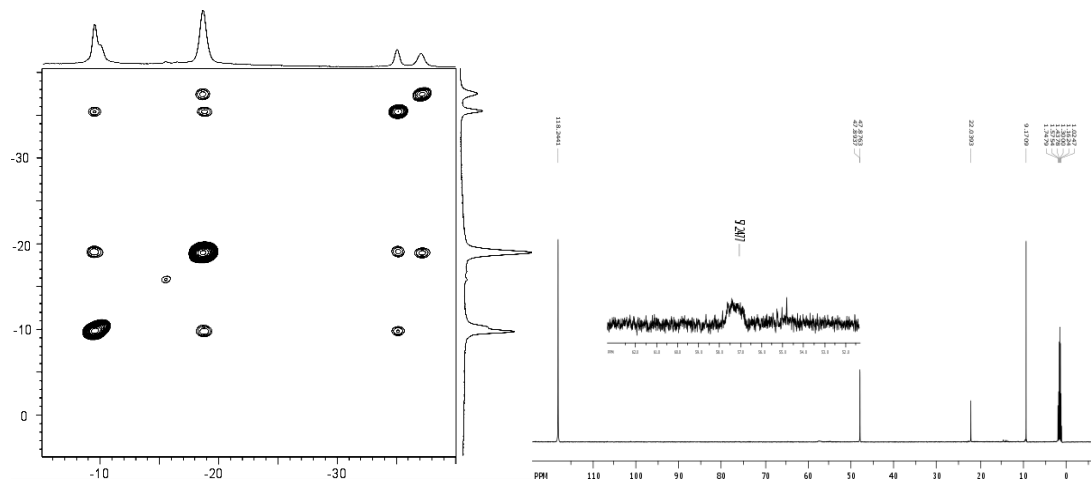

**Fig. S4.**  $^{11}\text{B}$ - $^{11}\text{B}$  COSY and  $^{13}\text{C}$  NMR NMR spectra of 7,8- $\text{Me}_2$ -*nido*-7,8- $\text{C}_2\text{B}_9\text{H}_{10}^- \text{NHEt}_3^+$  (**2b**) (128.3 and 150.9 MHz,  $\text{CD}_3\text{CN}$ ).

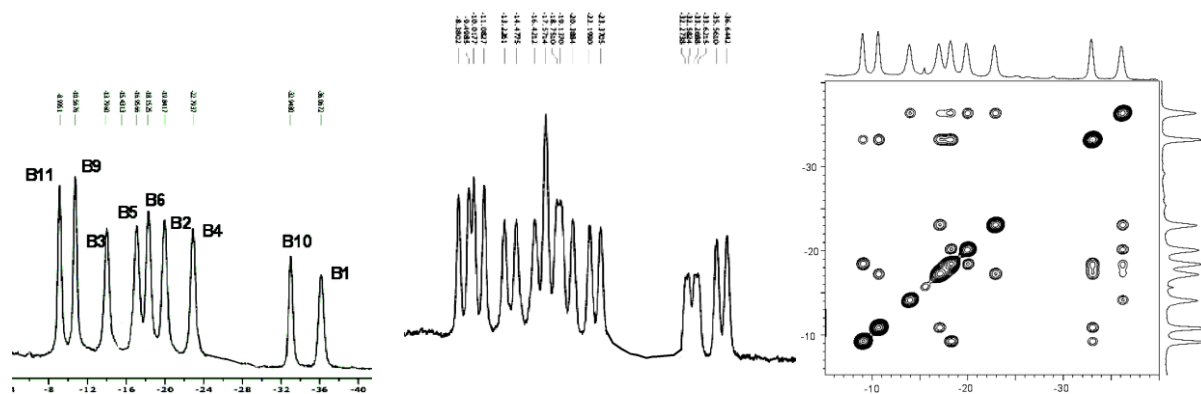

**Fig. S5.**  $^{11}\text{B}\{^1\text{H}\}$ ,  $^{11}\text{B}$ , and  $^{11}\text{B}$ - $^{11}\text{B}$ -COSY NMR spectra of 7-Ph-*nido*-7,8- $\text{C}_2\text{B}_9\text{H}_{11}^- \text{NHEt}_3^+$  (**2c**) (128.3 MHz,  $\text{CD}_3\text{CN}$ ).

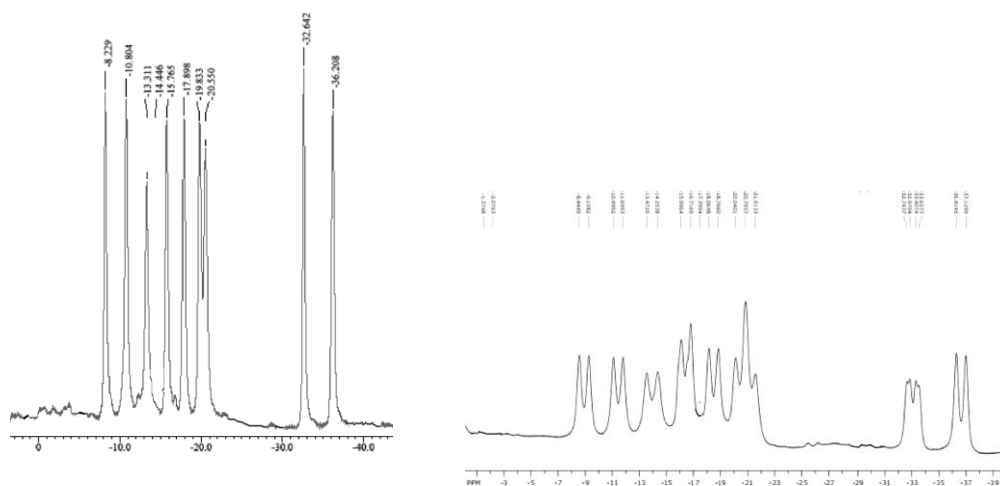

**Fig. S6.** 190 MHz  $^{11}\text{B}\{^1\text{H}\}$  and  $^{11}\text{B}$  NMR spectra of 7-naphthyl-*nido*-7,8- $\text{C}_2\text{B}_9\text{H}_{11}^- \text{NHEt}_3^+$  (**2d**) (192.6 MHz,  $\text{CD}_3\text{CN}$ ).

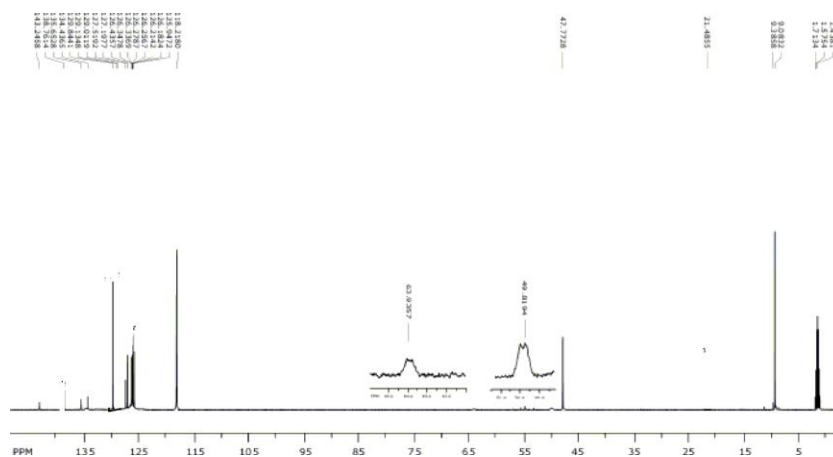

**Fig. S7.**  $^{13}\text{C}$  NMR spectrum (150.9 MHz,  $\text{CD}_3\text{CN}$ ) of 7-naph-*nido*-7,8- $\text{C}_2\text{B}_9\text{H}_{11}^- \text{NHEt}_3^+$  (**2d**).
